# Supplementary material
Source: PubMed Central journal article supplement (PMC2639070)

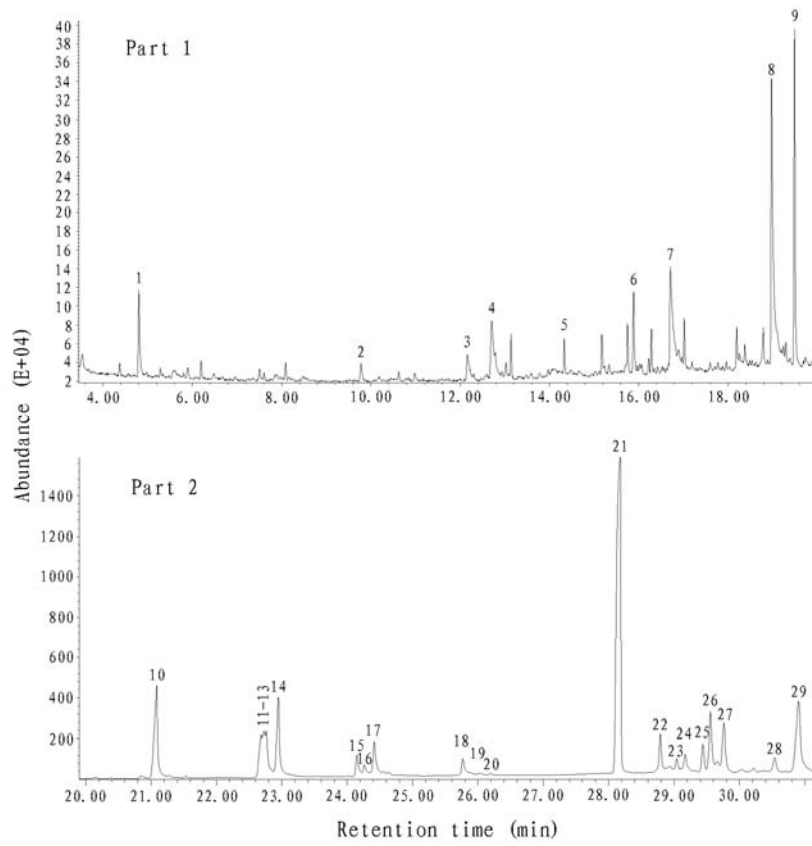

Fig. 1

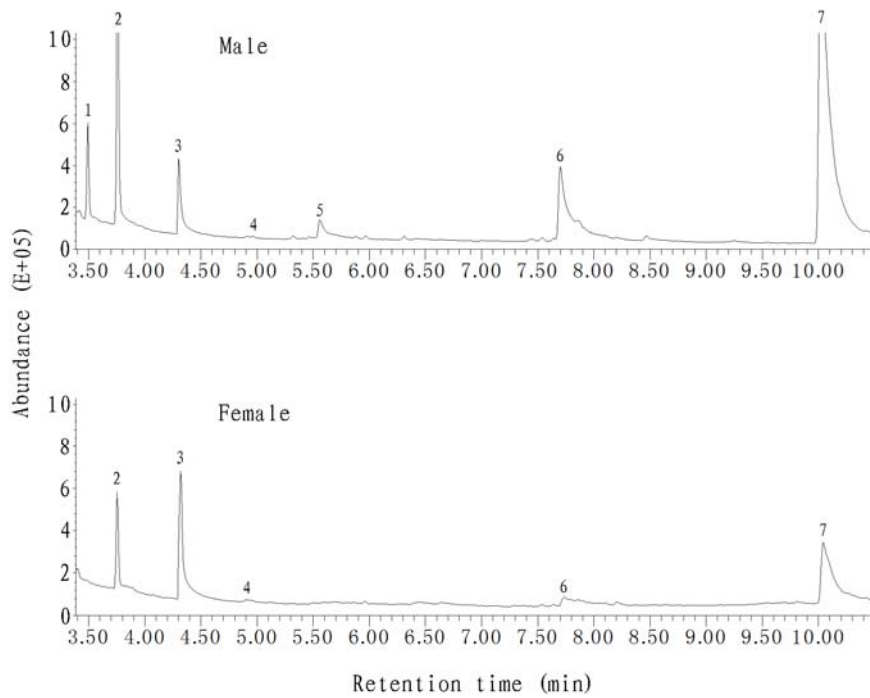

Fig. 2

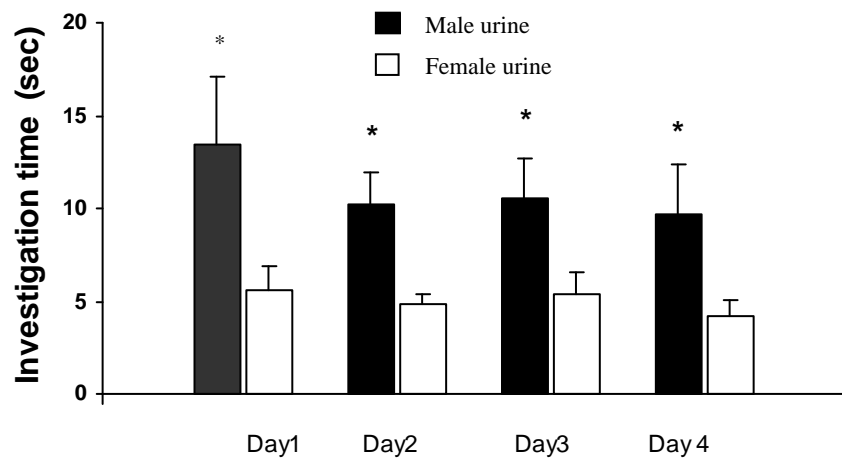

Figure 3.

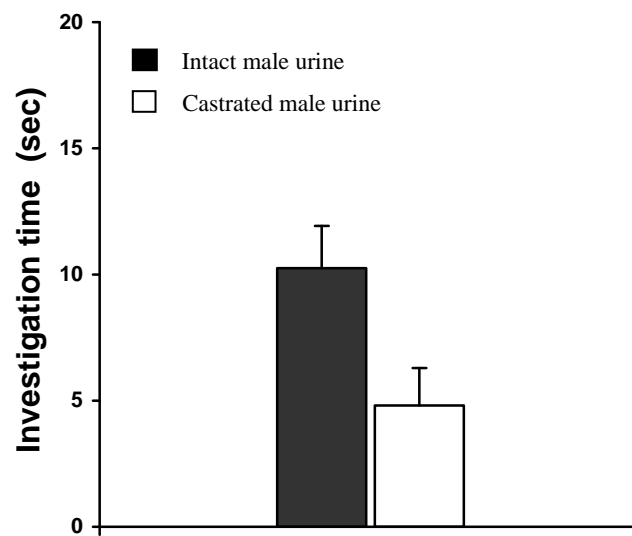

Figure 4.

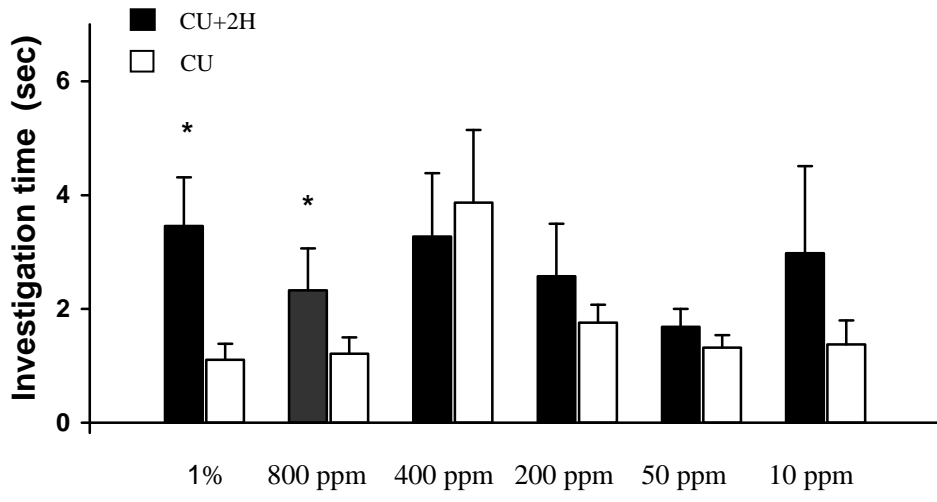

Figure 5

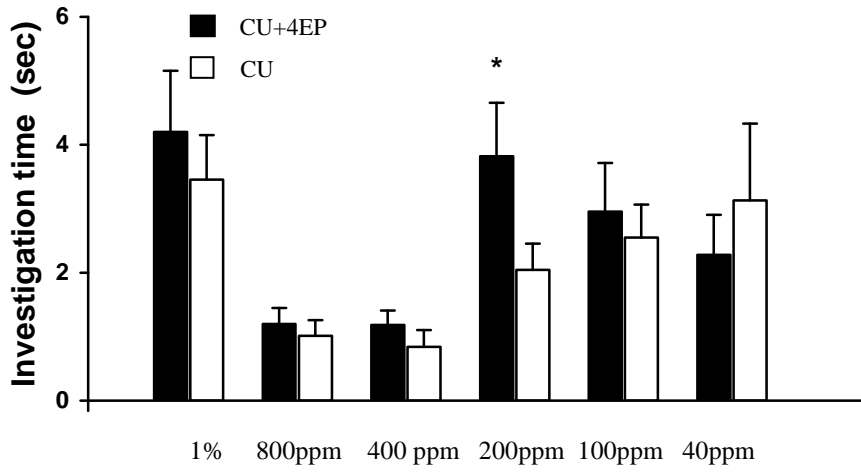

Figure 6

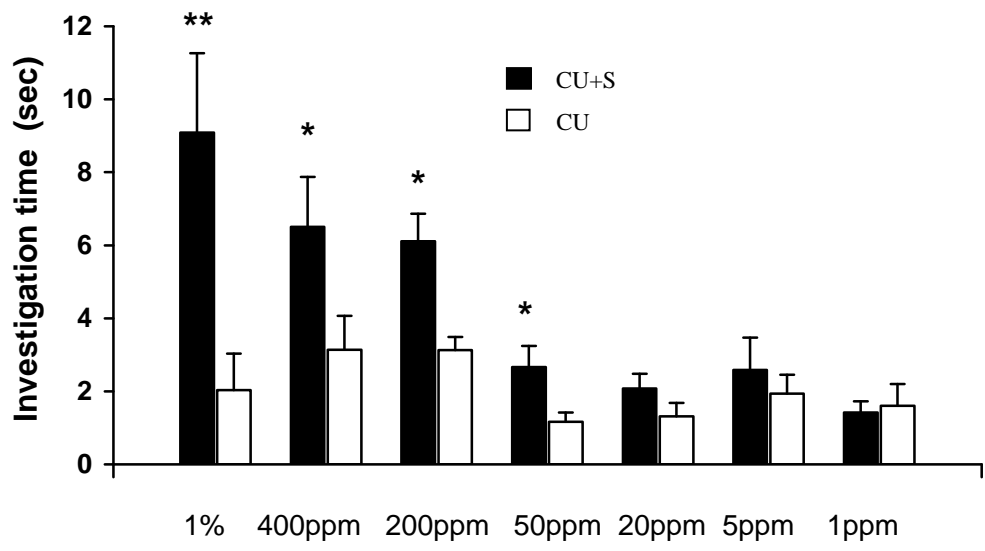

Figure 7

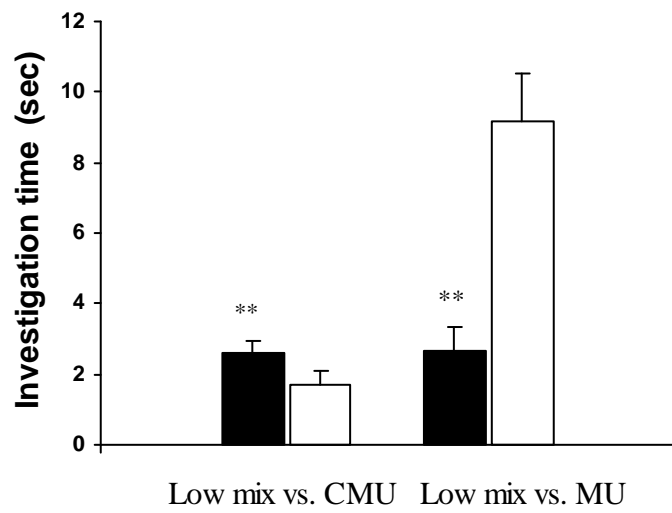

Figure 8.

Supplement: bjn028_1.pdf [file bjn028_1.pdf]
